# Supplementary material for: A 31P-NMR study of the H+-MoO42−-(HP)O32−-HPO42−-(C6H5P)O32−-(CH3P)O32− system at low Motot/Ptot ratio - Formation of mixed-hetero X2M5-type polyanions
Source: Royal Society of Chemistry journal article supplement (doi:10.1039/b818530a), 2009-01-01

Supplementary Material

Figure S1. Whole  $^{31}\text{P}$ -NMR chemical shift range ( $^1\text{H}$ -coupled spectra) of the six-component system at three different  $\text{pH}$  values.  $M_o = 120 \text{ mM}$ ,  $(\text{HP}) = (\text{OP}) = (\text{PhP}) = (\text{MeP}) = 20 \text{ mM}$ .

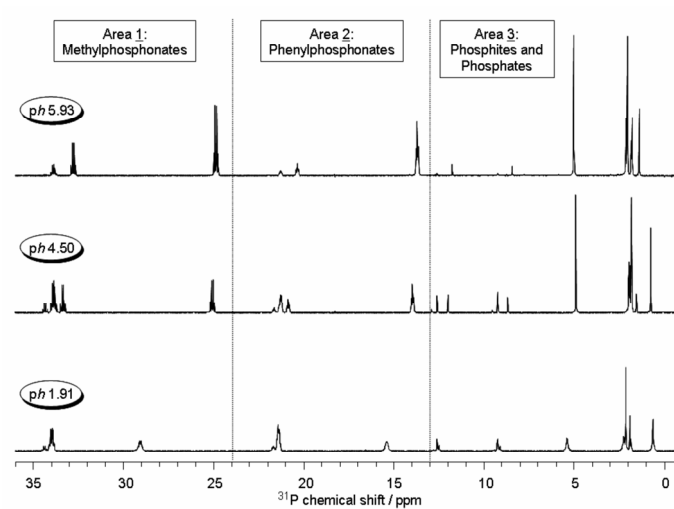

Figure S2. Cumulative distribution diagrams of (a) phosphite, (b) phosphate, (c) phenylphosphonate and (d) methylphosphonate.  $Mo = 120 \text{ mM}$ ,  $(HP) = (OP) = (PhP) = (MeP) = 20 \text{ mM}$ .

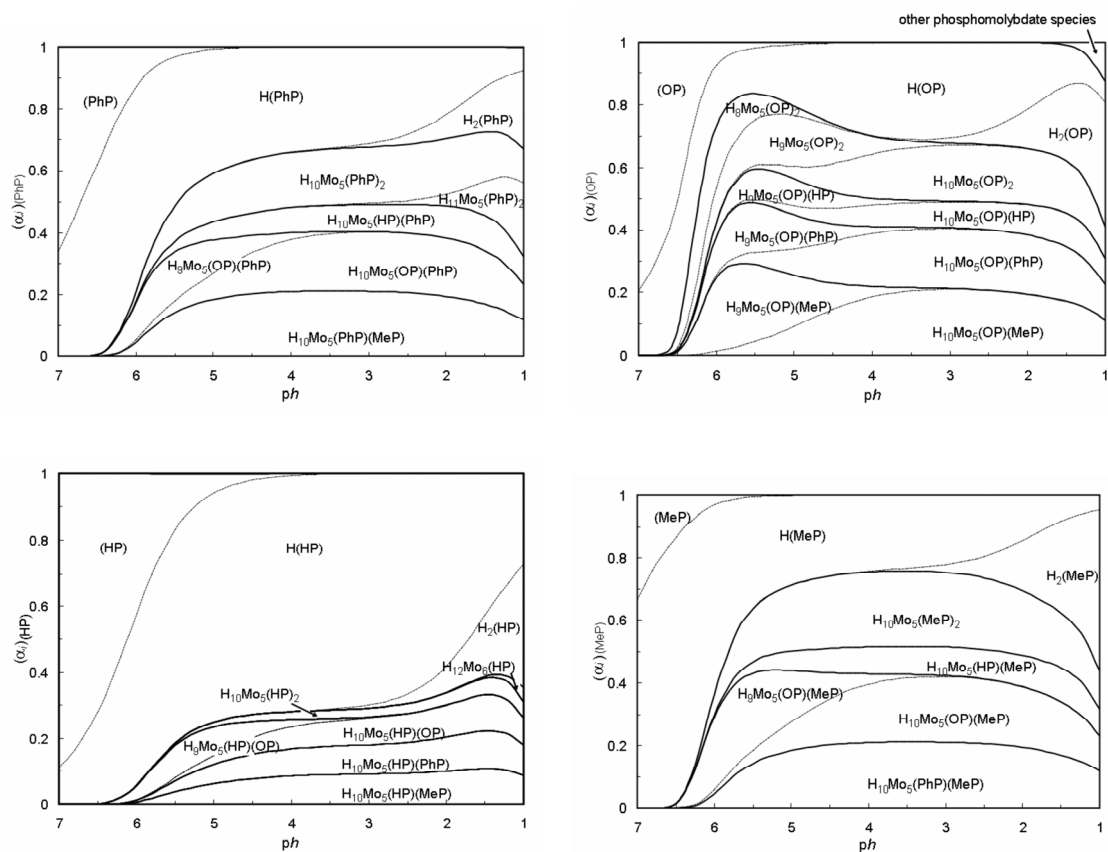

Supplement: b818530a.pdf [file b818530a.pdf]
